# Supplementary material
Source: publisher figshare collection journal article supplement (https://sage.figshare.com/ndownloader/files/24172159)
Supplement: Supplementary file 1 [file 24172159]

## Sheet: Reactome analysis
	Glycosaminoglycan-protein interactions: the first draft of the glycosaminoglycan interactome
	Sylvain D. Vallet, Olivier Clerc and Sylvie Ricard-Blum*
					Univ Lyon, University Claude Bernard Lyon 1, CNRS, INSA Lyon, CPE, Institute of Molecular and Supramolecular Chemistry and Biochemistry, UMR 5246, F-69622 Villeurbanne cedex, France.
SUPPLEMENTARY TABLE S4
Pathway analysis was performed using Reactome (PMIDs 26656494 and 31691815). The 25 most relevant pathways sorted by p-value are listed below
Reactome extracted 25 overrepresentated Pathways
Pathway name	Entities					Reactions			Species name
	Found	Total	ratio	pValue	FDR	found	total	ratio
ECM proteoglycans	50	79	0.005	1.11e-16	1.49e-14	23	23	0.002	Homo sapiens
Integrin cell surface interactions	50	86	0.006	1.11e-16	1.49e-14	53	54	0.004	Homo sapiens
Regulation of Insulin-like Growth Factor (IGF) transport and uptake by Insulin-like Growth Factor Binding Proteins (IGFBPs)	49	127	0.009	1.11e-16	1.49e-14	13	14	0.001	Homo sapiens
Degradation of the extracellular matrix	67	148	0.01	1.11e-16	1.49e-14	95	105	0.008	Homo sapiens
Extracellular matrix organization	128	329	0.023	1.11e-16	1.49e-14	287	318	0.025	Homo sapiens
Collagen degradation	36	69	0.005	1.11e-16	1.49e-14	30	34	0.003	Homo sapiens
Axon guidance	124	584	0.04	1.11e-16	1.49e-14	248	297	0.023	Homo sapiens
Collagen formation	43	104	0.007	1.11e-16	1.49e-14	63	77	0.006	Homo sapiens
Signaling by Receptor Tyrosine Kinases	145	622	0.043	1.11e-16	1.49e-14	570	698	0.055	Homo sapiens
Nervous system development	129	620	0.043	1.11e-16	1.49e-14	257	323	0.025	Homo sapiens
Non-integrin membrane-ECM interactions	39	61	0.004	1.11e-16	1.49e-14	16	22	0.002	Homo sapiens
Platelet degranulation	52	137	0.009	1.11e-16	1.49e-14	7	11	0.000866	Homo sapiens
Response to elevated platelet cytosolic Ca2+	52	144	0.01	1.11e-16	1.49e-14	7	14	0.001	Homo sapiens
Chemokine receptors bind chemokines	32	57	0.004	2.22e-16	2.78e-14	18	19	0.001	Homo sapiens
Post-translational protein phosphorylation	43	109	0.008	5.55e-16	6.05e-14	1	1	7.87e-05	Homo sapiens
Assembly of collagen fibrils and other multimeric structures	34	67	0.005	5.55e-16	6.05e-14	23	26	0.002	Homo sapiens
PI5P, PP2A and IER3 Regulate PI3K/AKT Signaling	46	126	0.009	8.88e-16	9.15e-14	3	7	0.000551	Homo sapiens
Constitutive Signaling by Aberrant PI3K in Cancer	41	103	0.007	2e-15	1.94e-13	1	2	0.000157	Homo sapiens
FGFR2 ligand binding and activation	22	26	0.002	3.89e-15	3.57e-13	5	5	0.000394	Homo sapiens
Negative regulation of the PI3K/AKT network	46	134	0.009	8.22e-15	7.15e-13	3	10	0.000787	Homo sapiens
PI3K/AKT Signaling in Cancer	45	134	0.009	3.41e-14	2.83e-12	5	21	0.002	Homo sapiens
Collagen chain trimerization	26	44	0.003	5.04e-14	3.98e-12	17	28	0.002	Homo sapiens
Phospholipase C-mediated cascade; FGFR2	20	25	0.002	1.89e-13	1.4e-11	3	3	0.000236	Homo sapiens
EPH-ephrin mediated repulsion of cells	28	55	0.004	1.92e-13	1.4e-11	9	9	0.000709	Homo sapiens
MET activates PTK2 signaling	22	32	0.002	2.34e-13	1.64e-11	5	5	0.000394	Homo sapiens
